# Supplementary material for: Small molecule PGC-1α1 protein stabilizers induce adipocyte Ucp1 expression and uncoupled mitochondrial respiration
Source: PubMed Central journal article supplement — Mol Metab. 2018 Feb 3;9:28–42. doi: 10.1016/j.molmet.2018.01.017 (PMC5870114; doi:10.1016/j.molmet.2018.01.017), 2018-02-03
Supplement: mmc1.pdf [file mmc1.pdf]

S-Fig.1

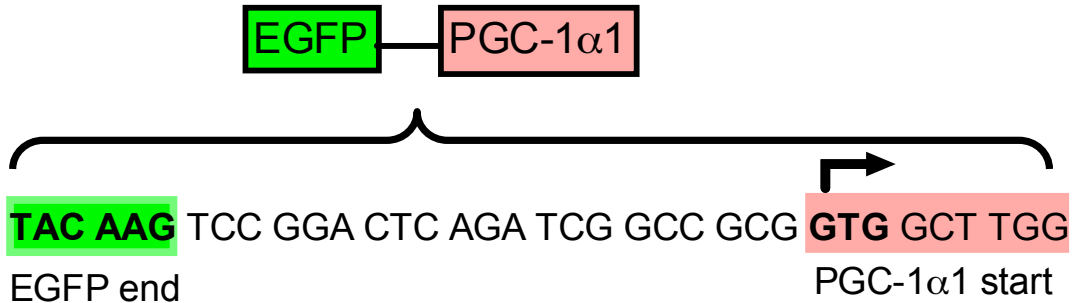

S-Fig.2

A

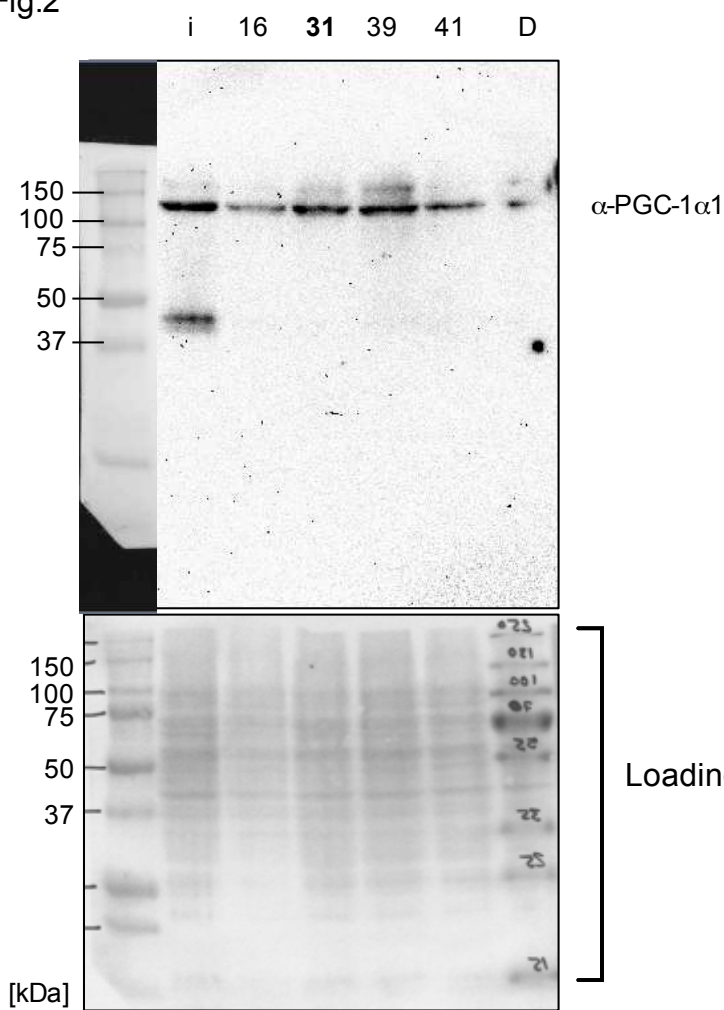

B

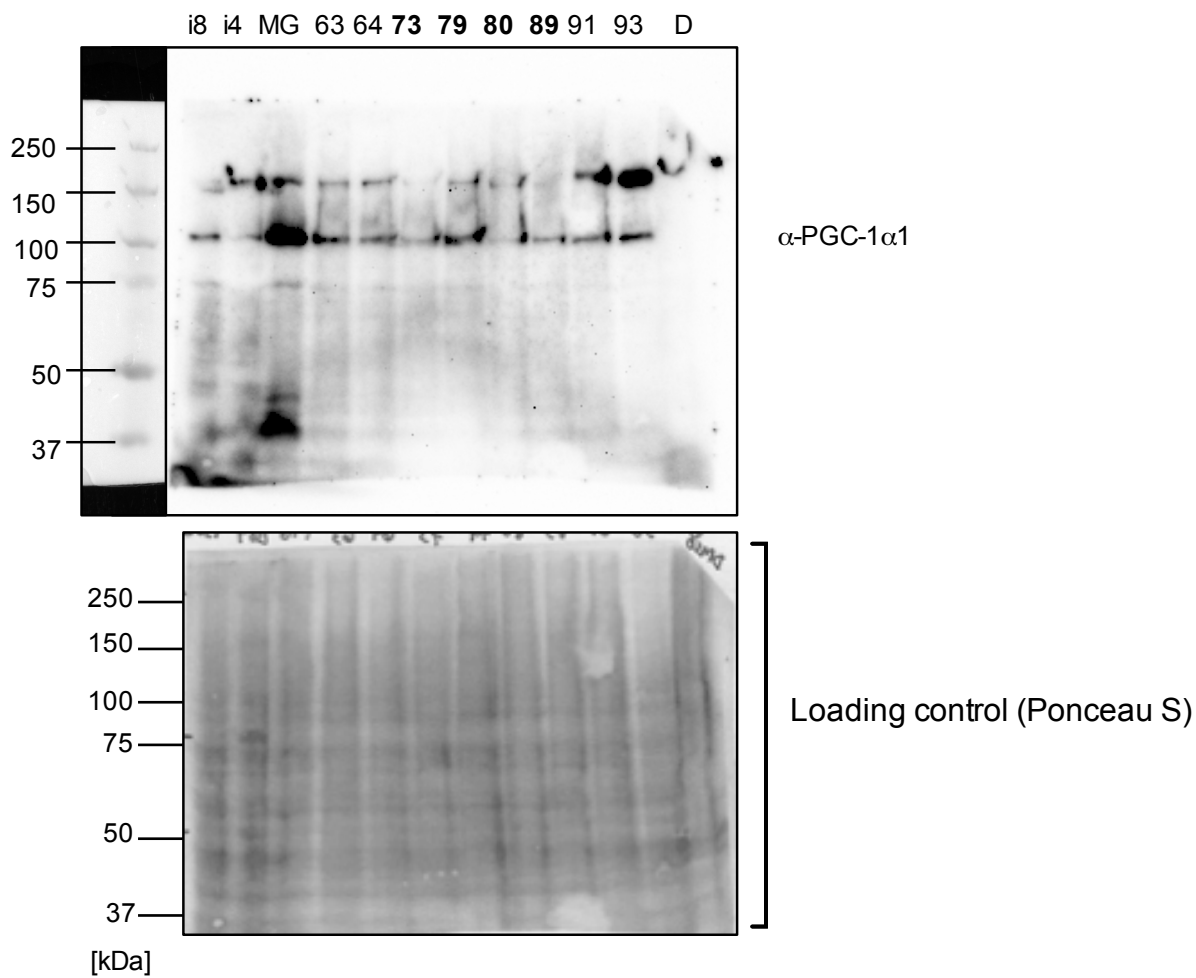

S-Fig.3

A.

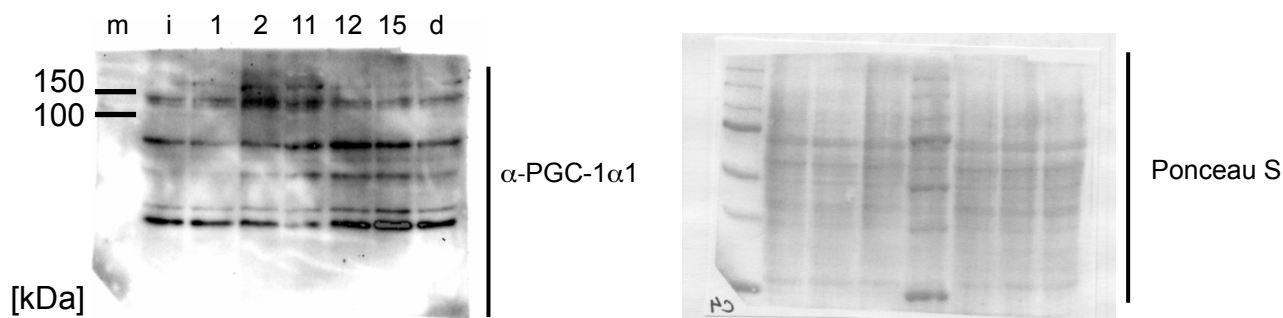

B.

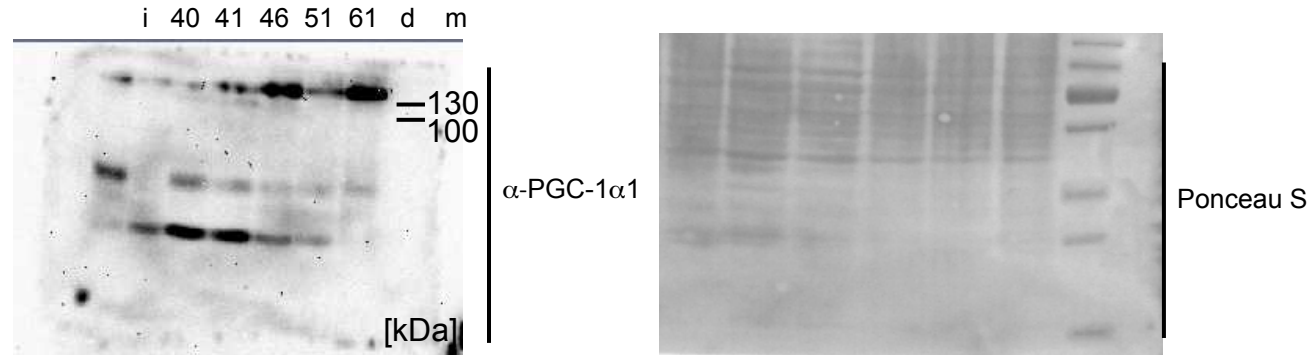

C.

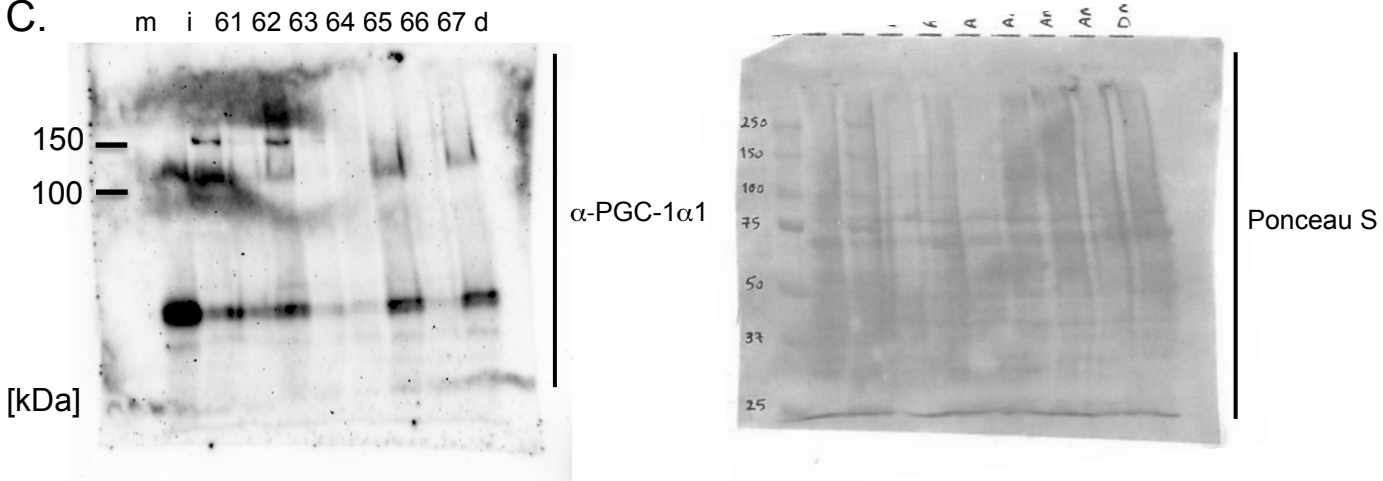

D.

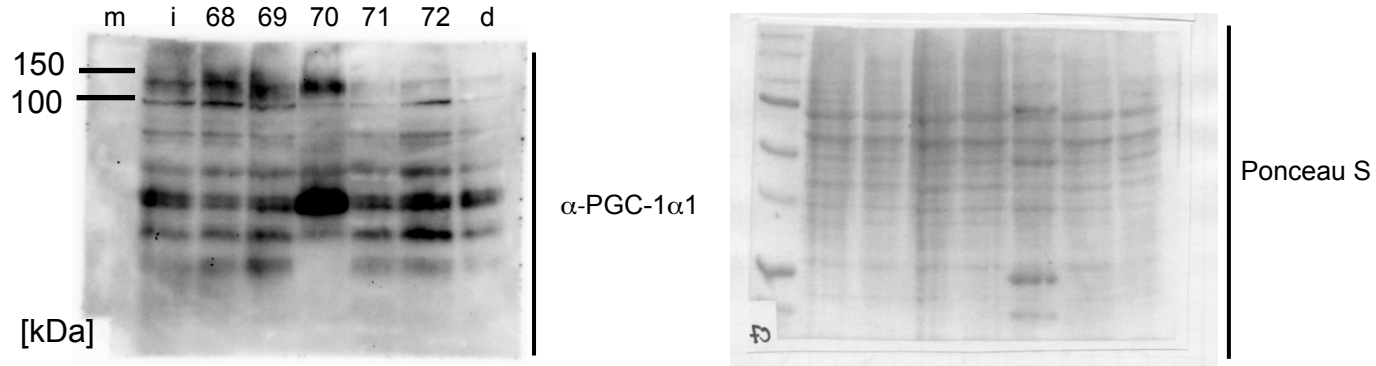

S-Fig.4

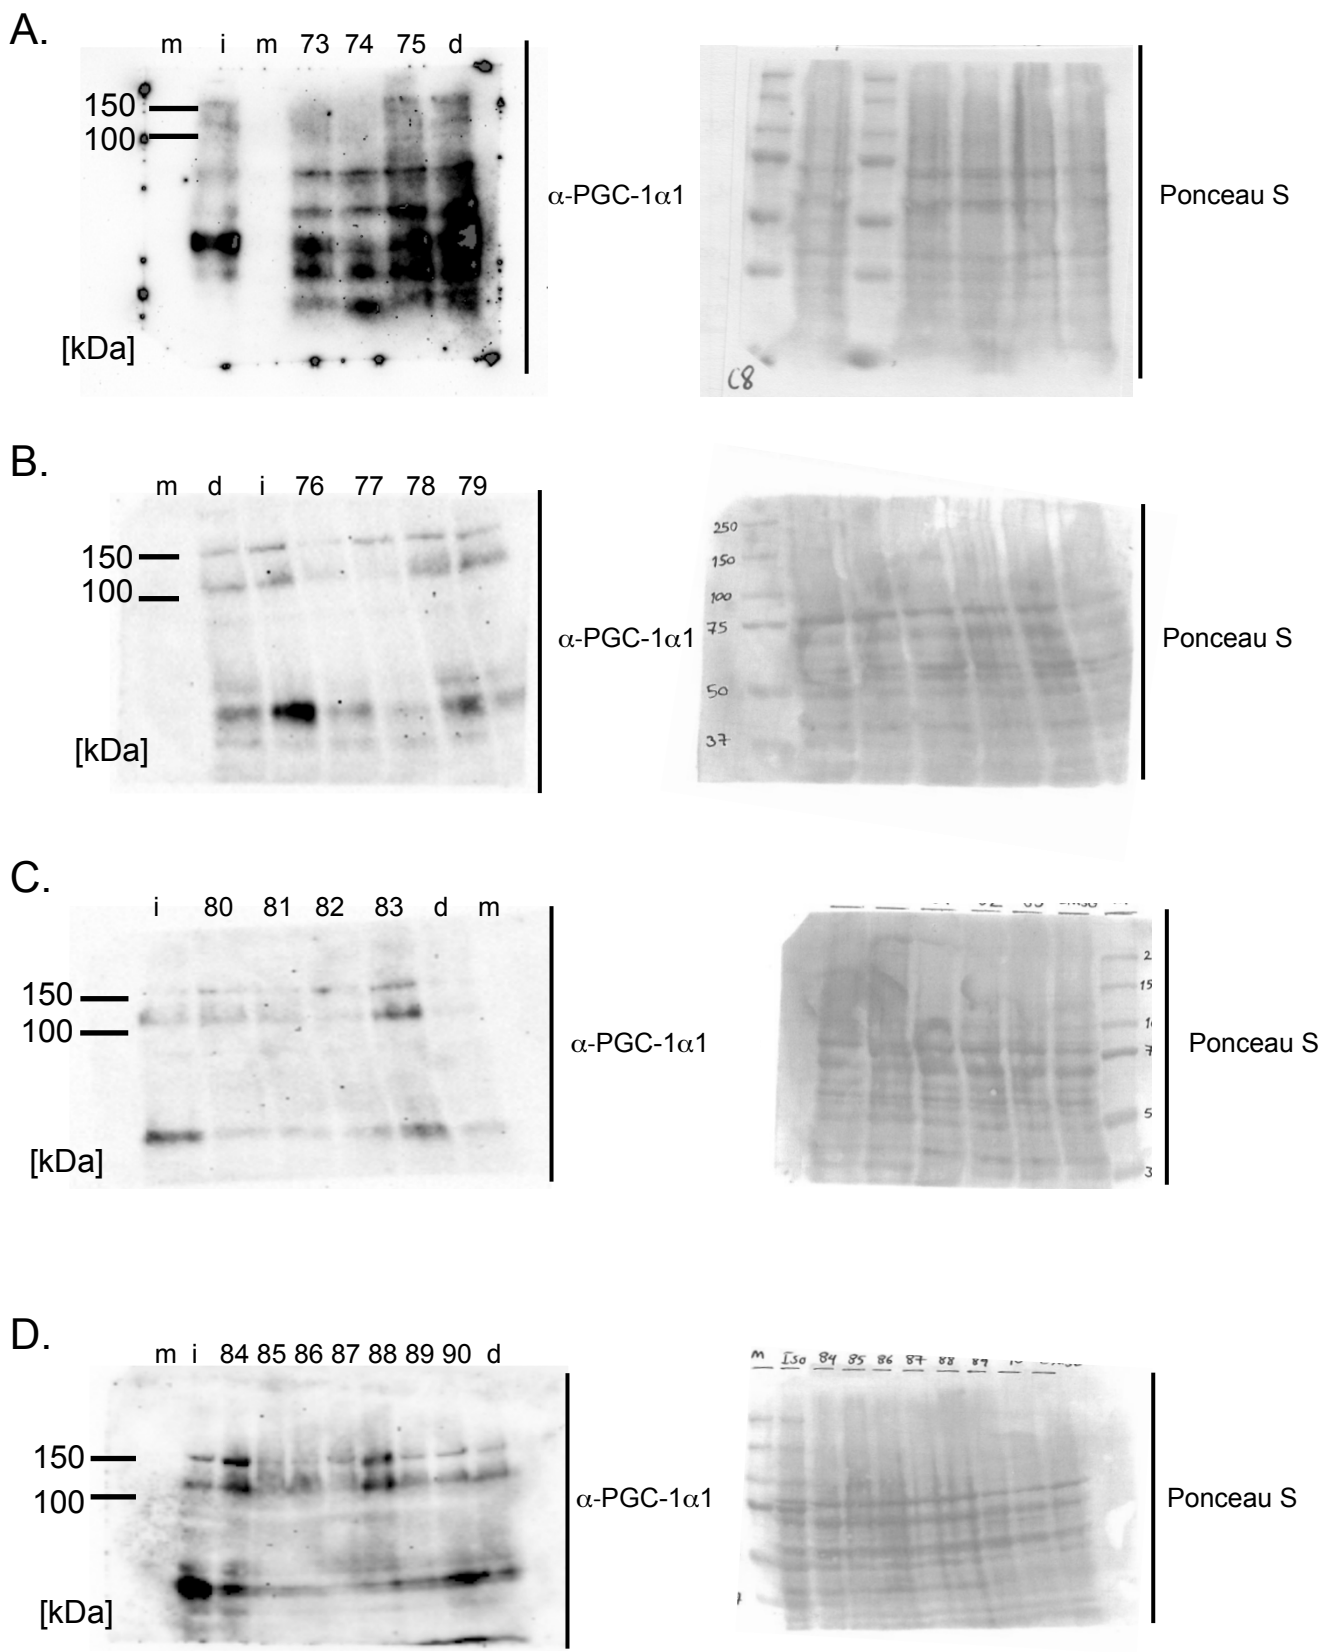

S-Fig.5

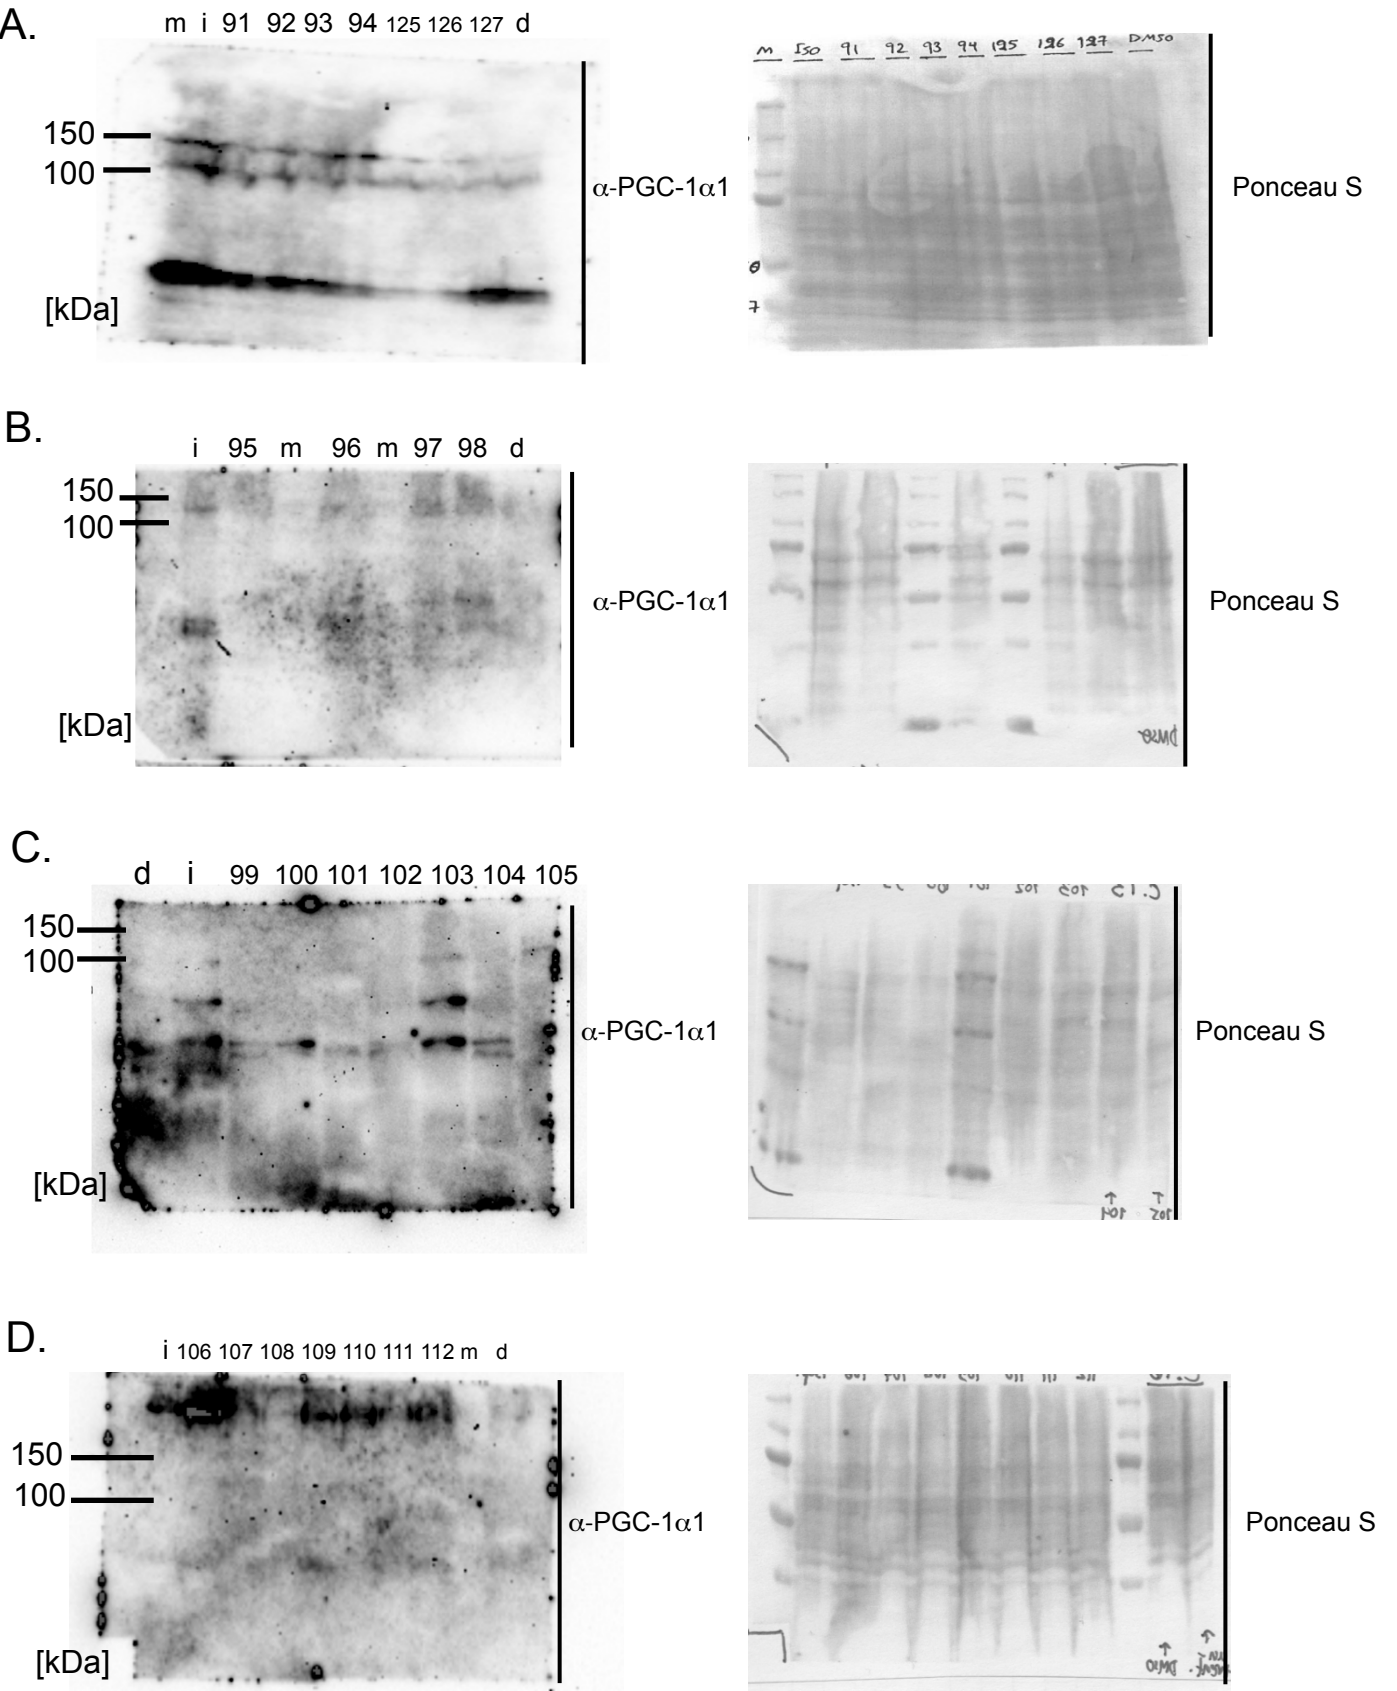

# S-Fig.6

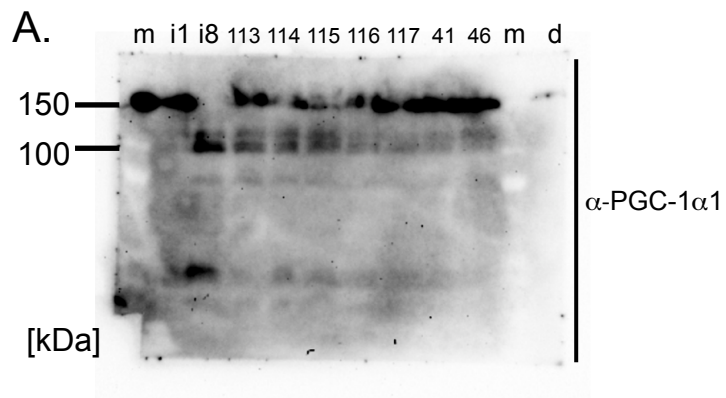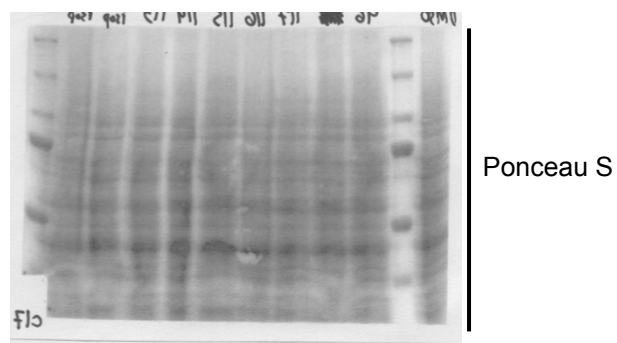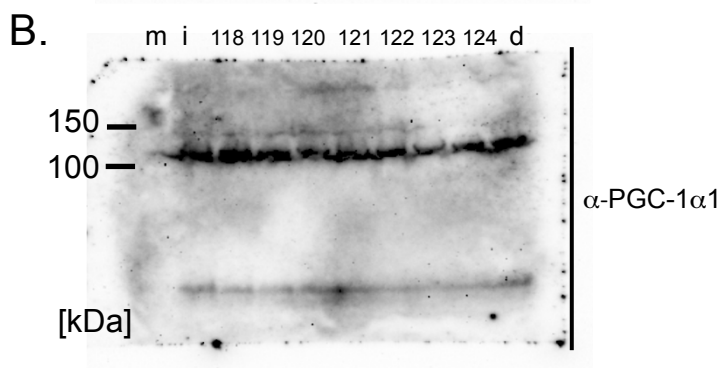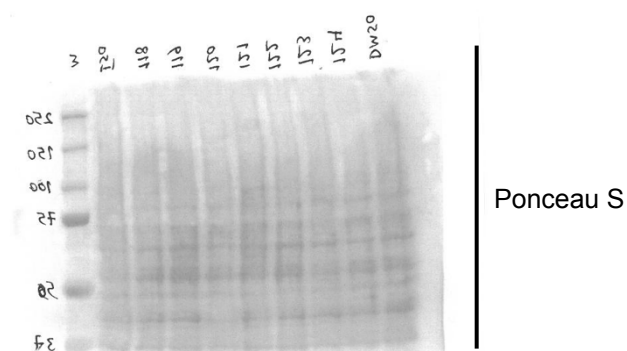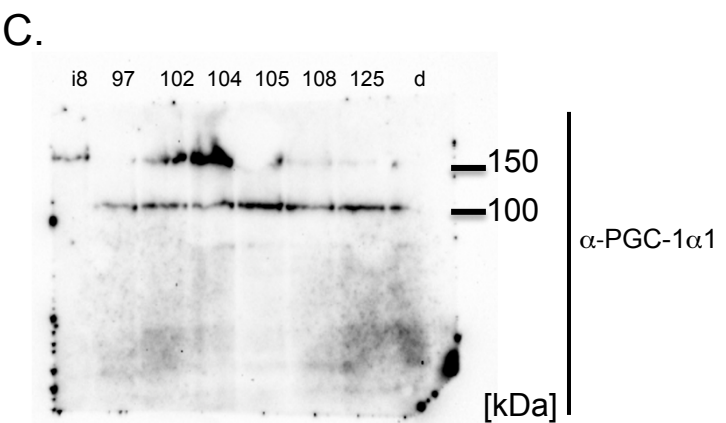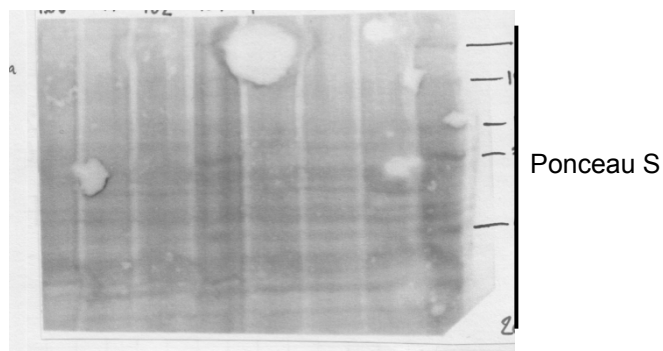

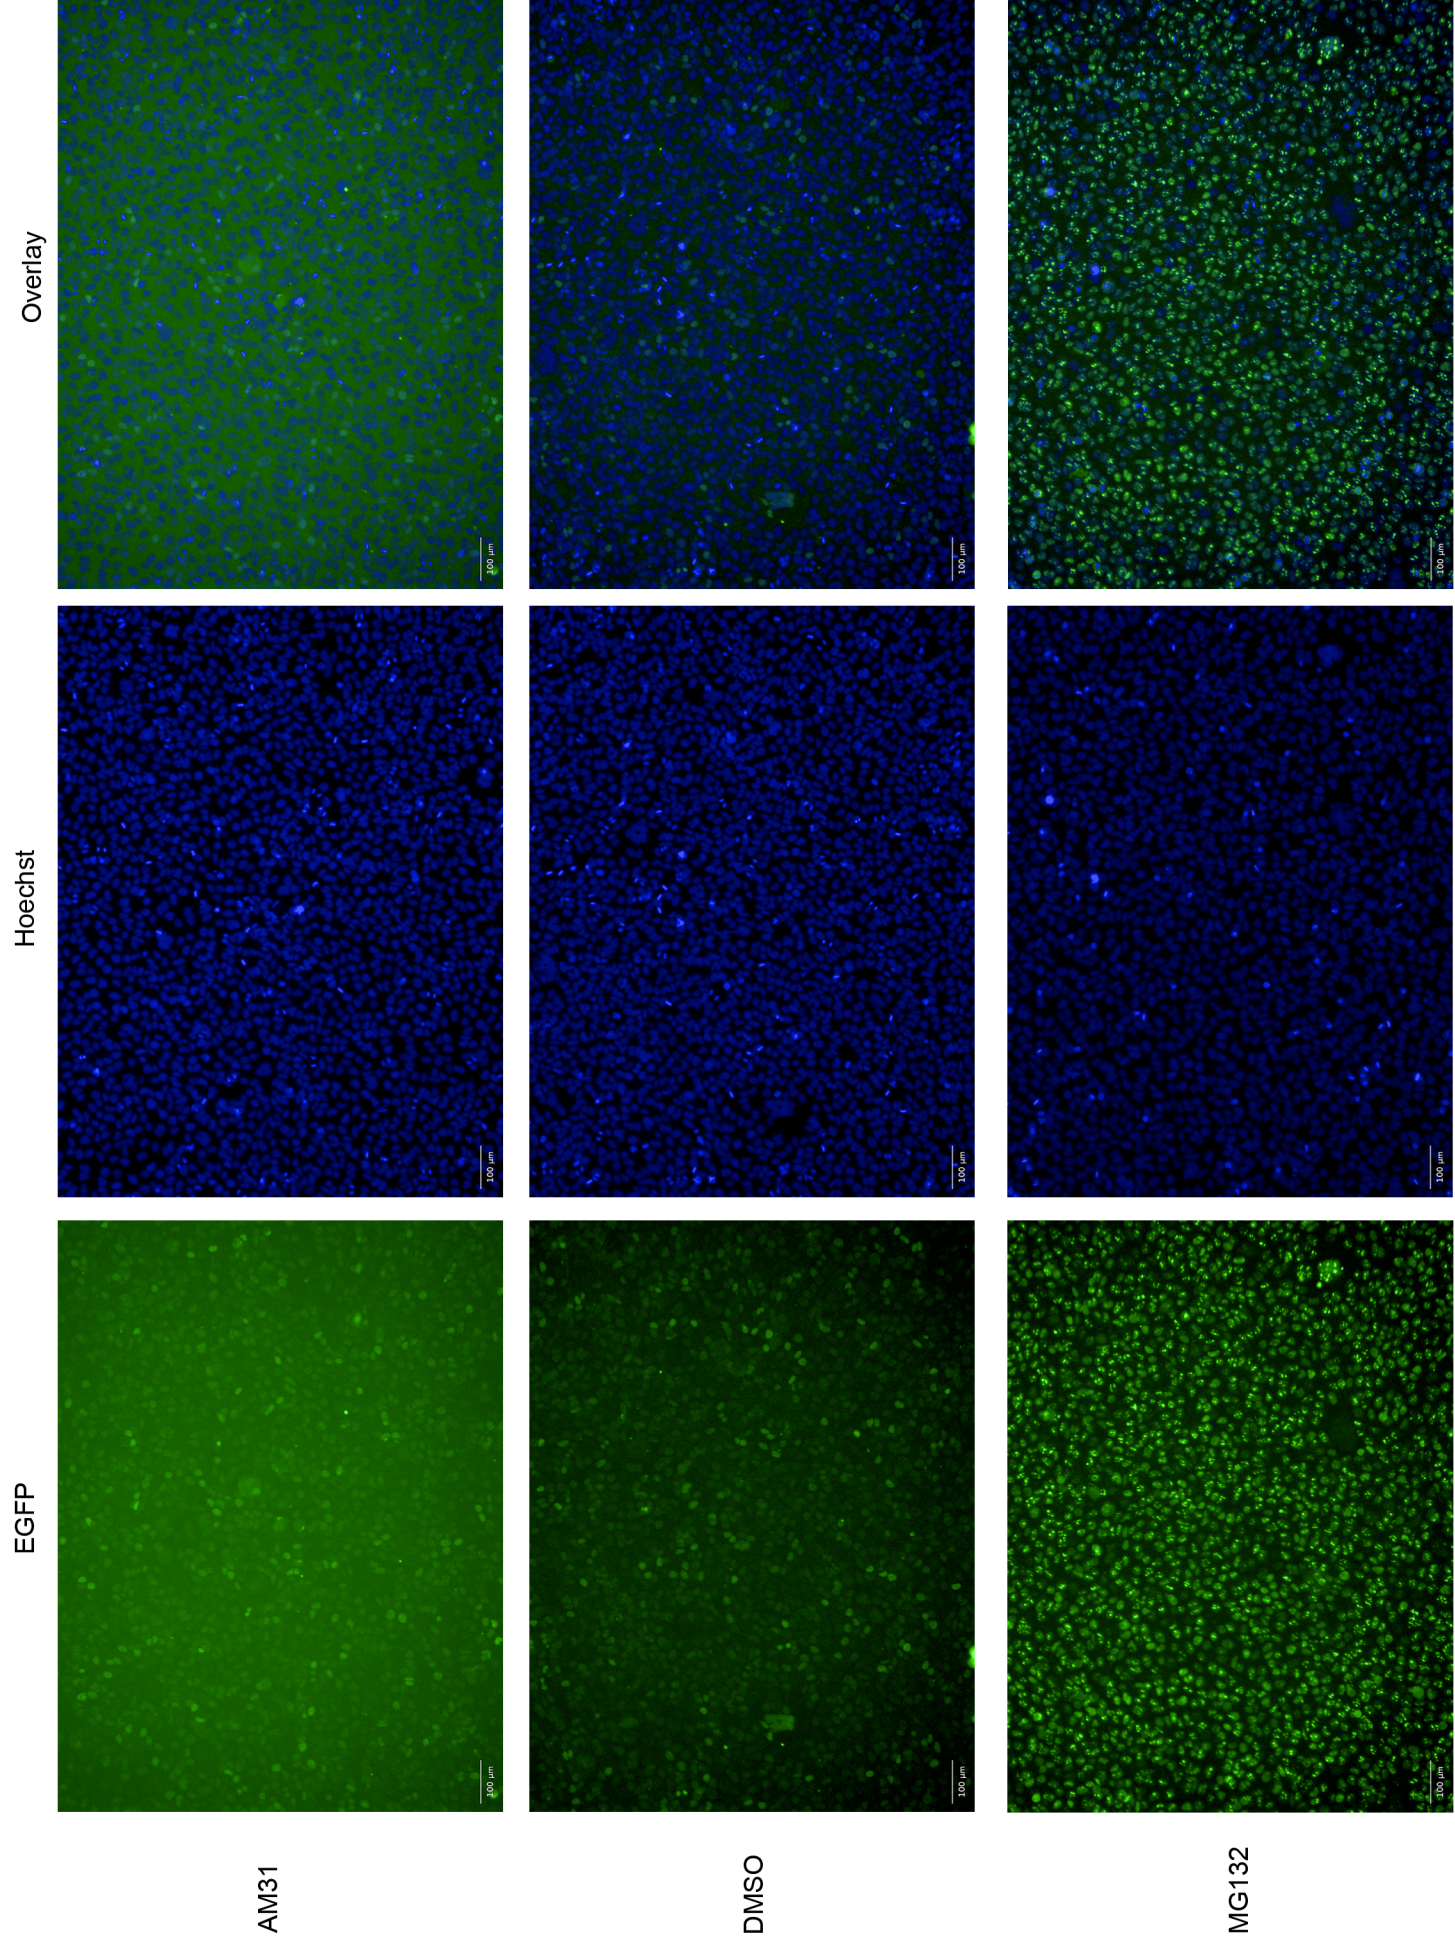

S-Fig.8

EGFP

Hoechst

Overlay

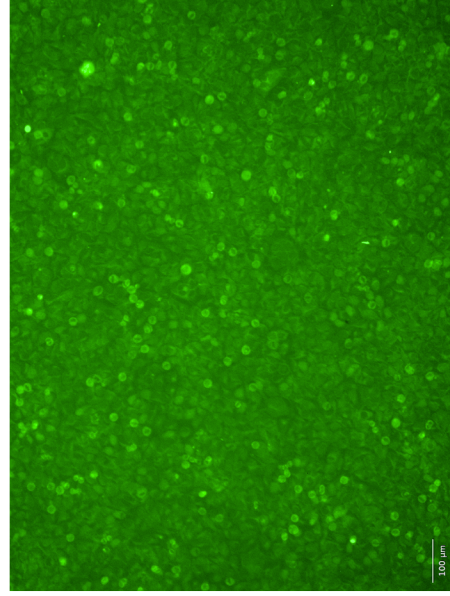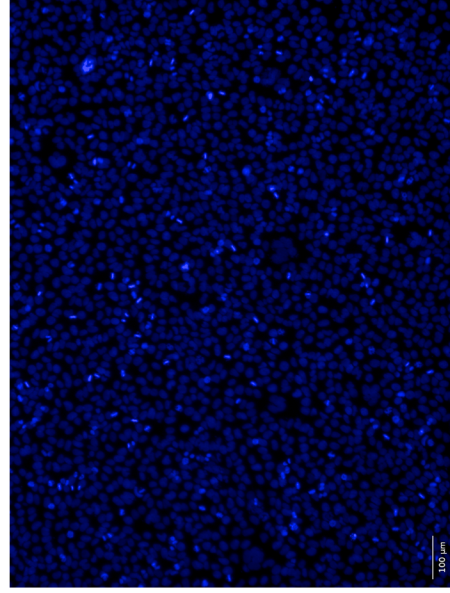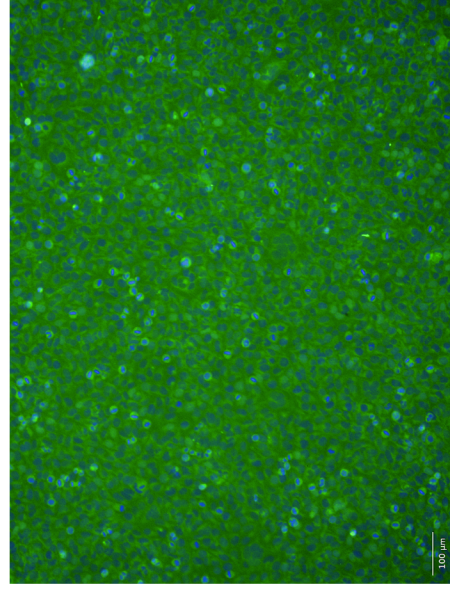

AM73

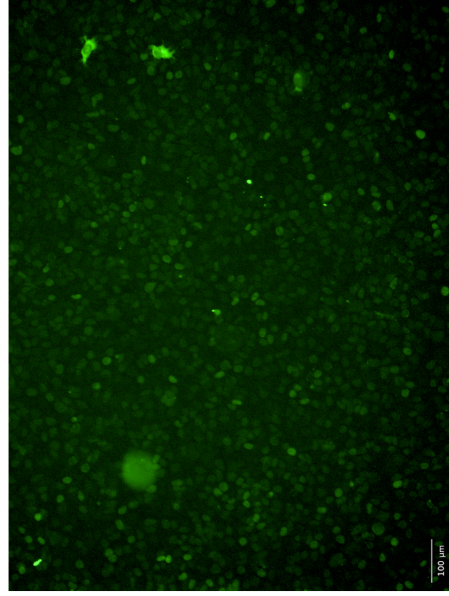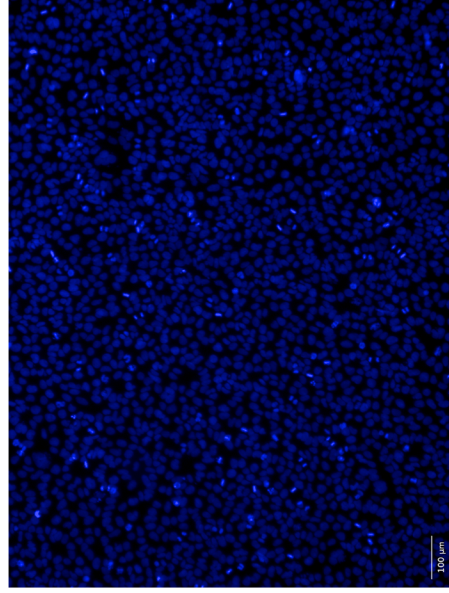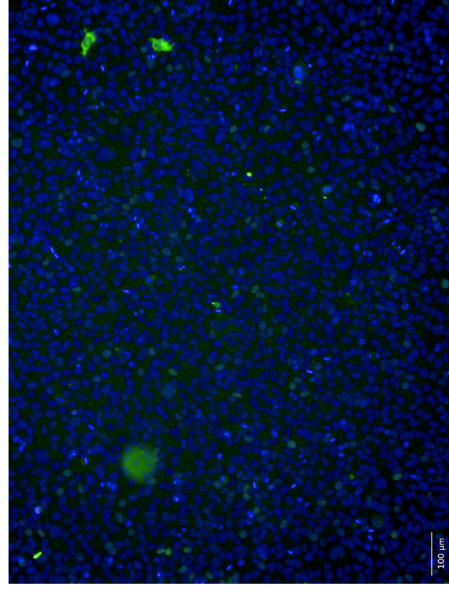

DMSO

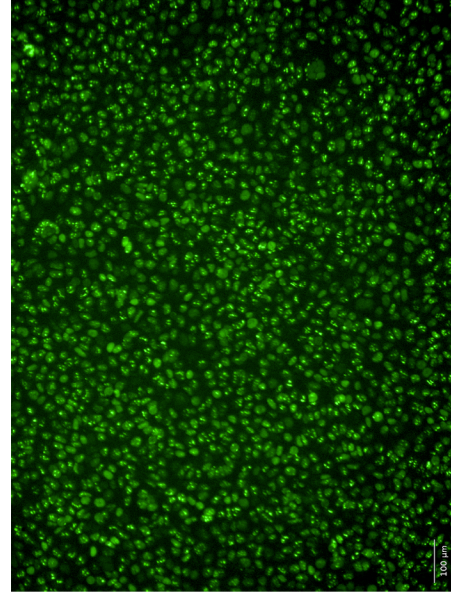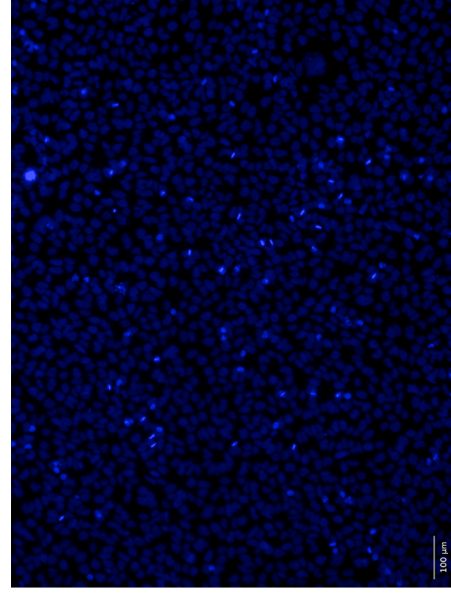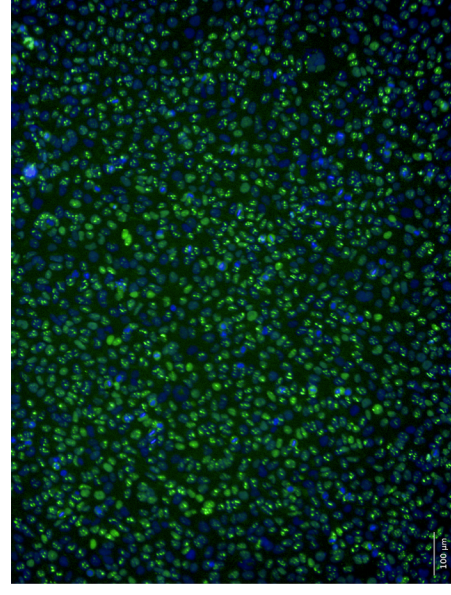

MG132

S-Fig.9

EGFP

Hoechst

Overlay

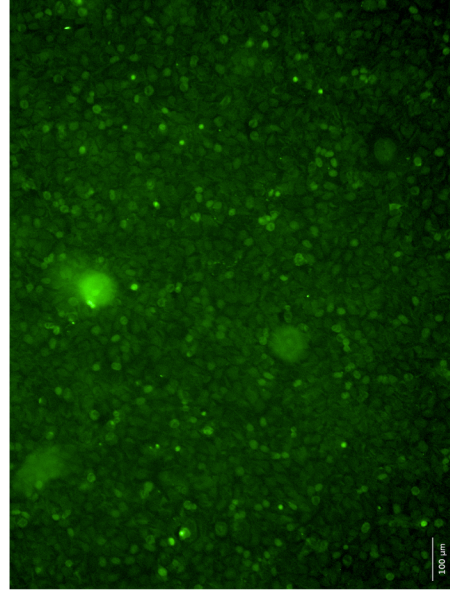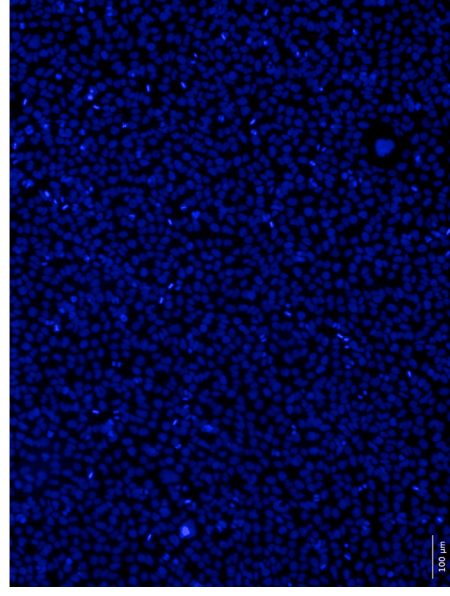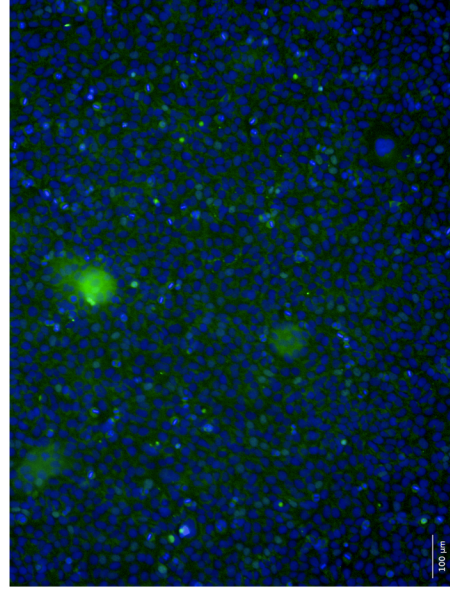

AM79

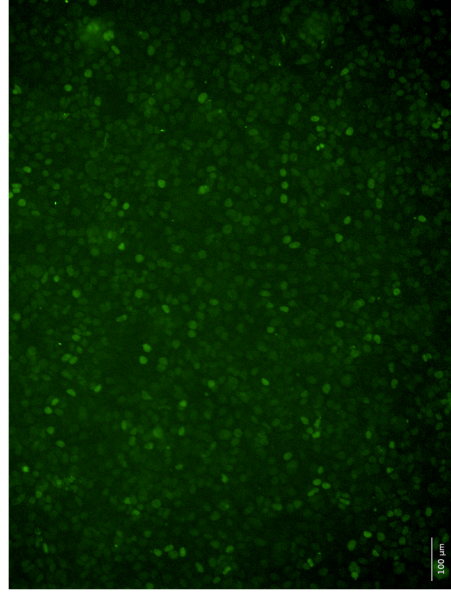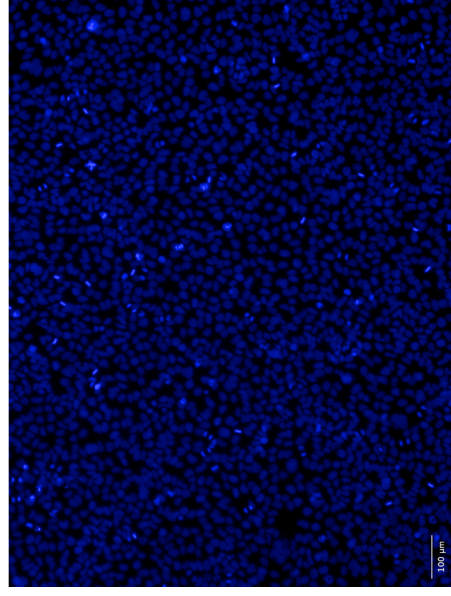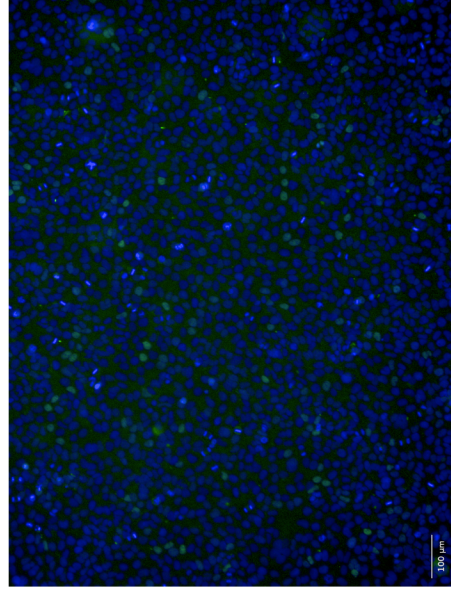

DMSO

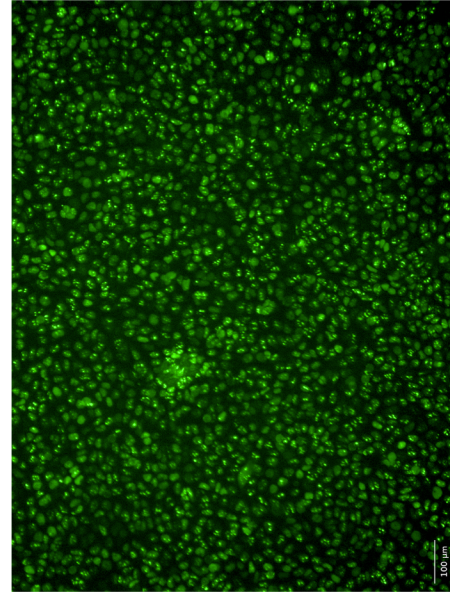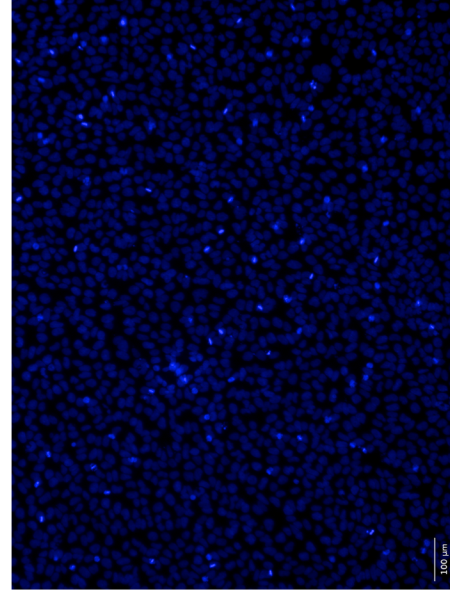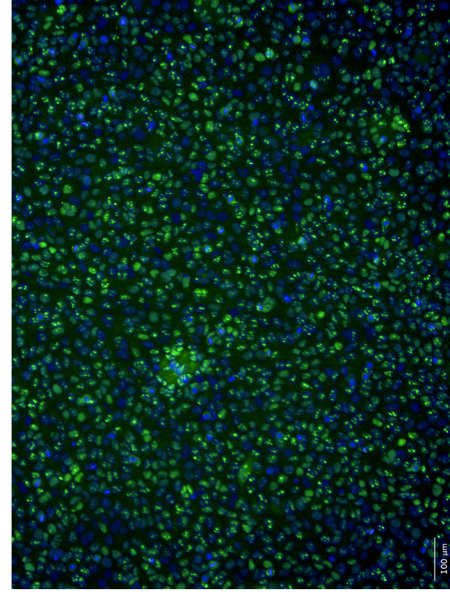

MG132

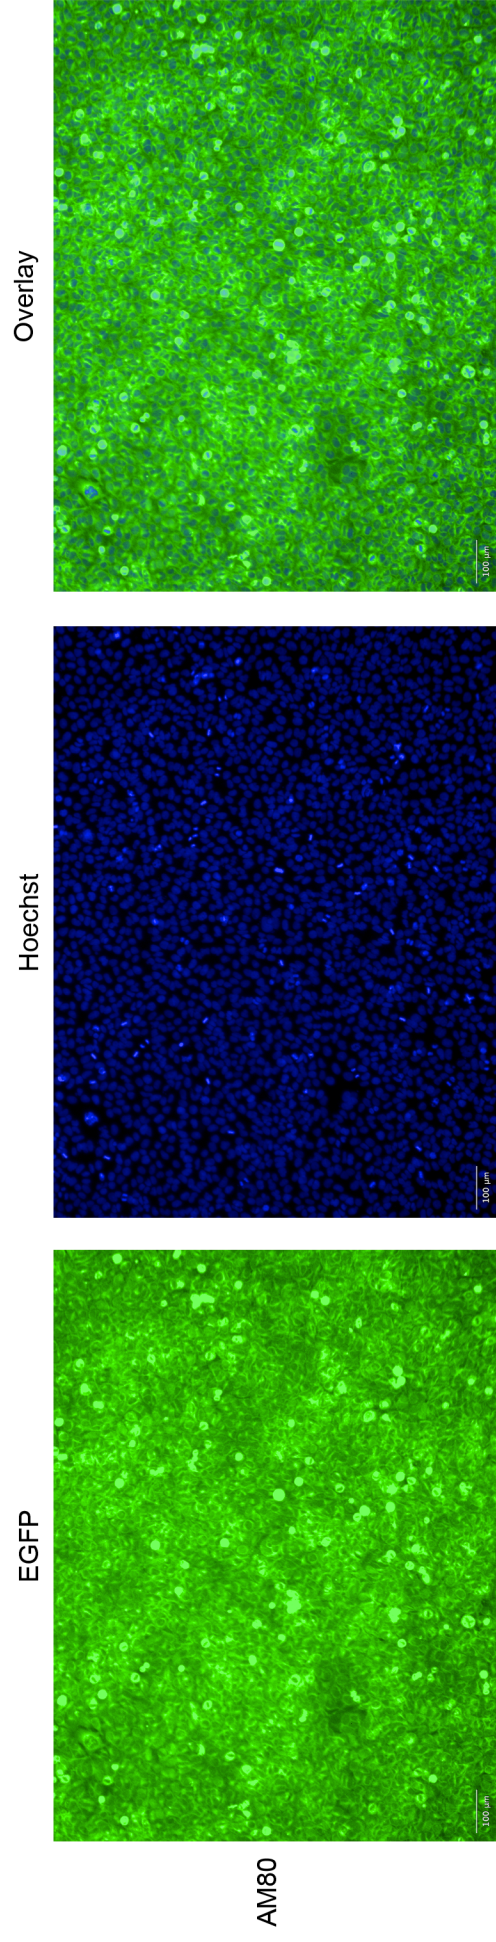

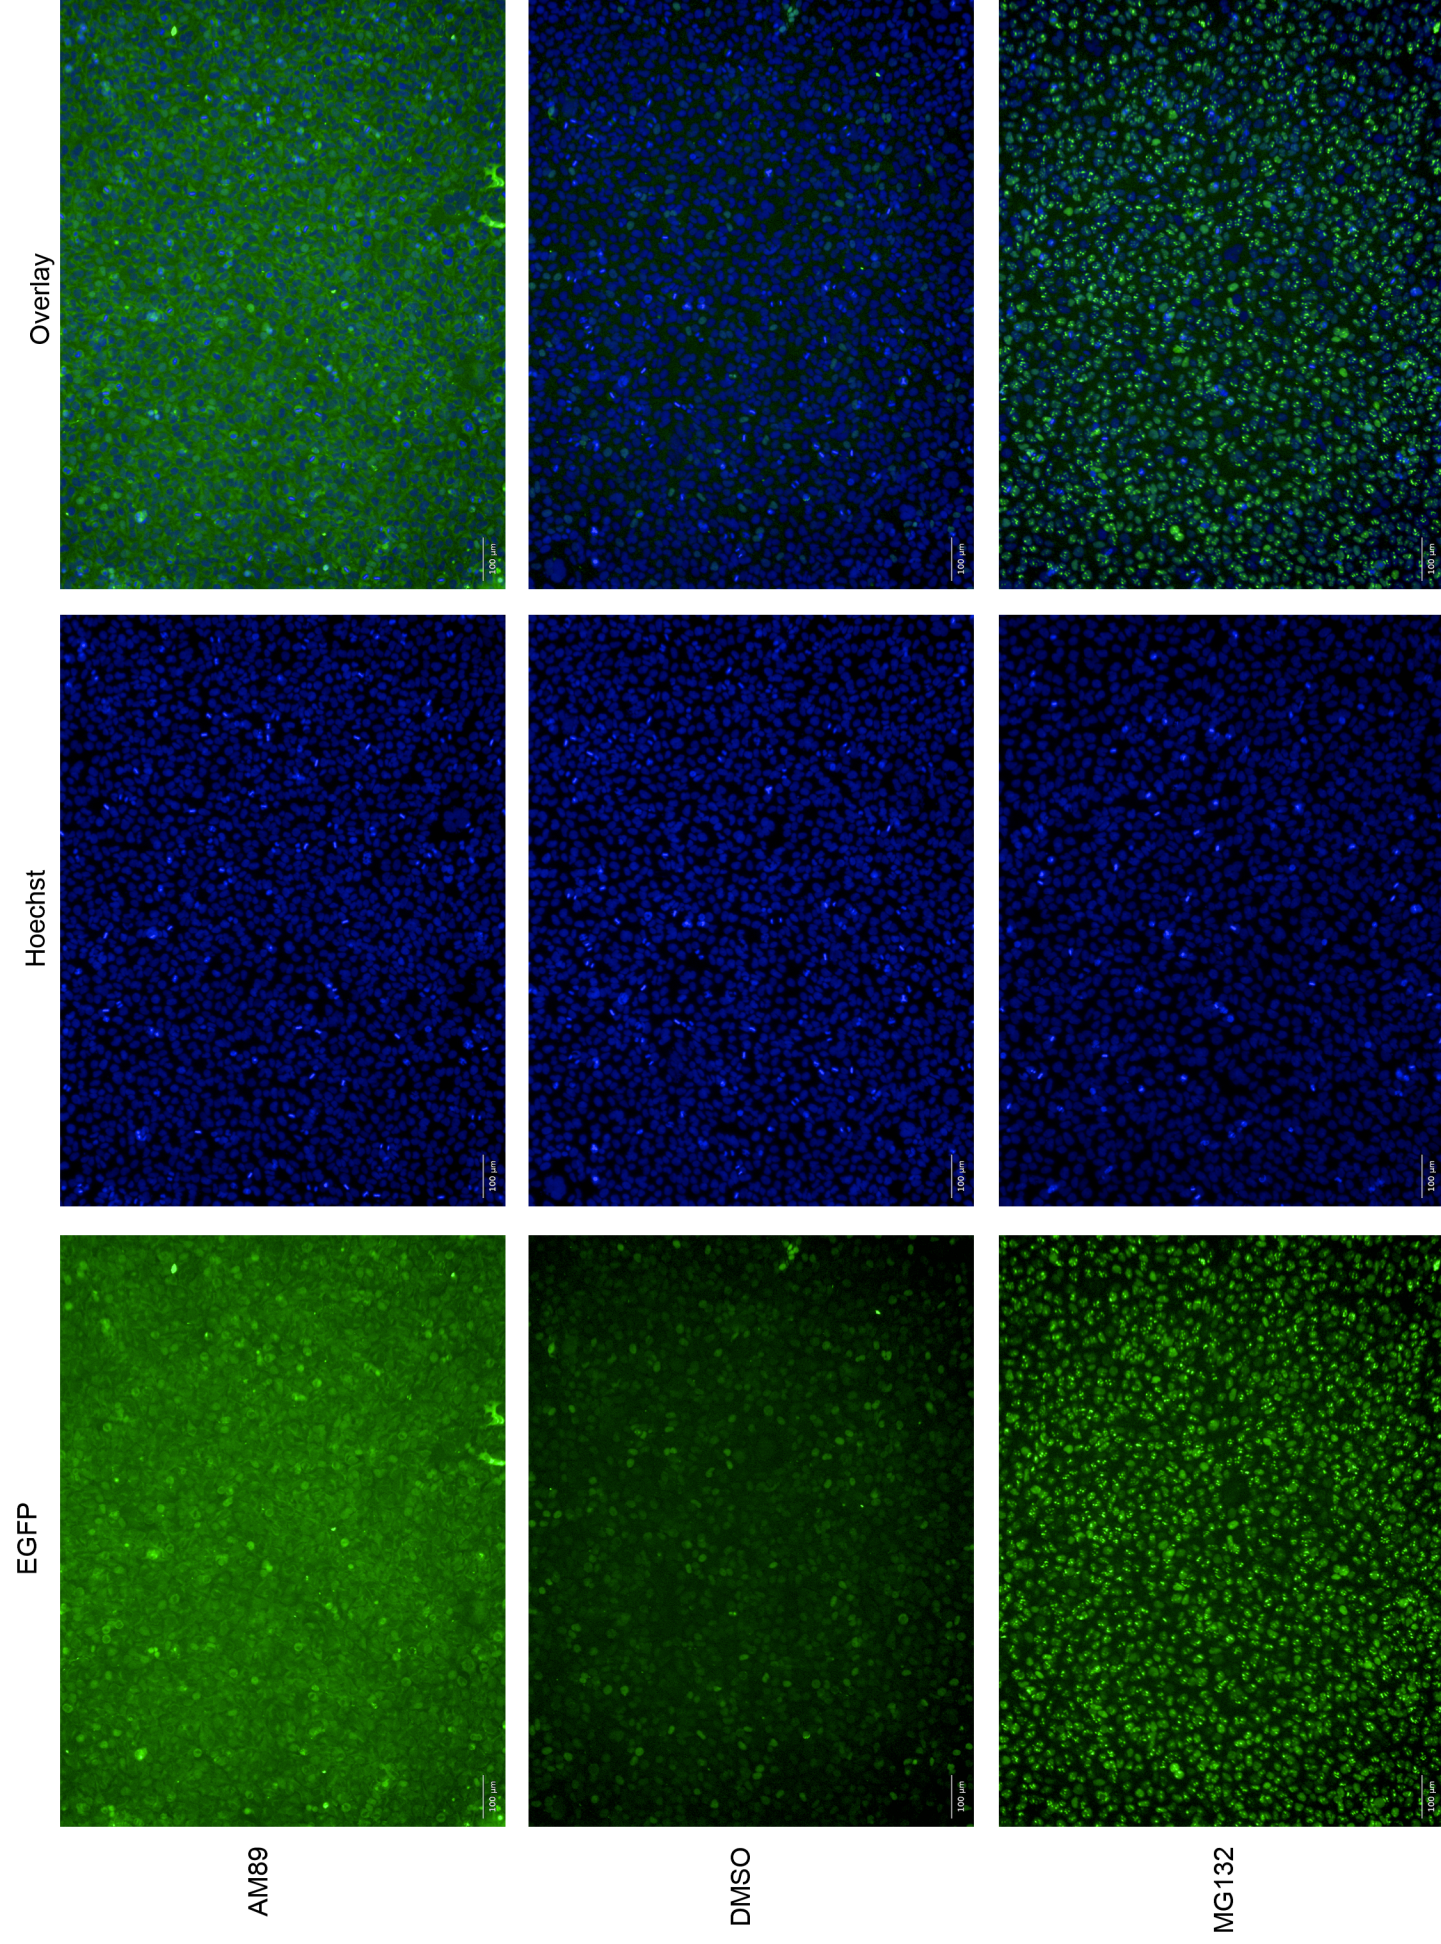

S-Fig.12

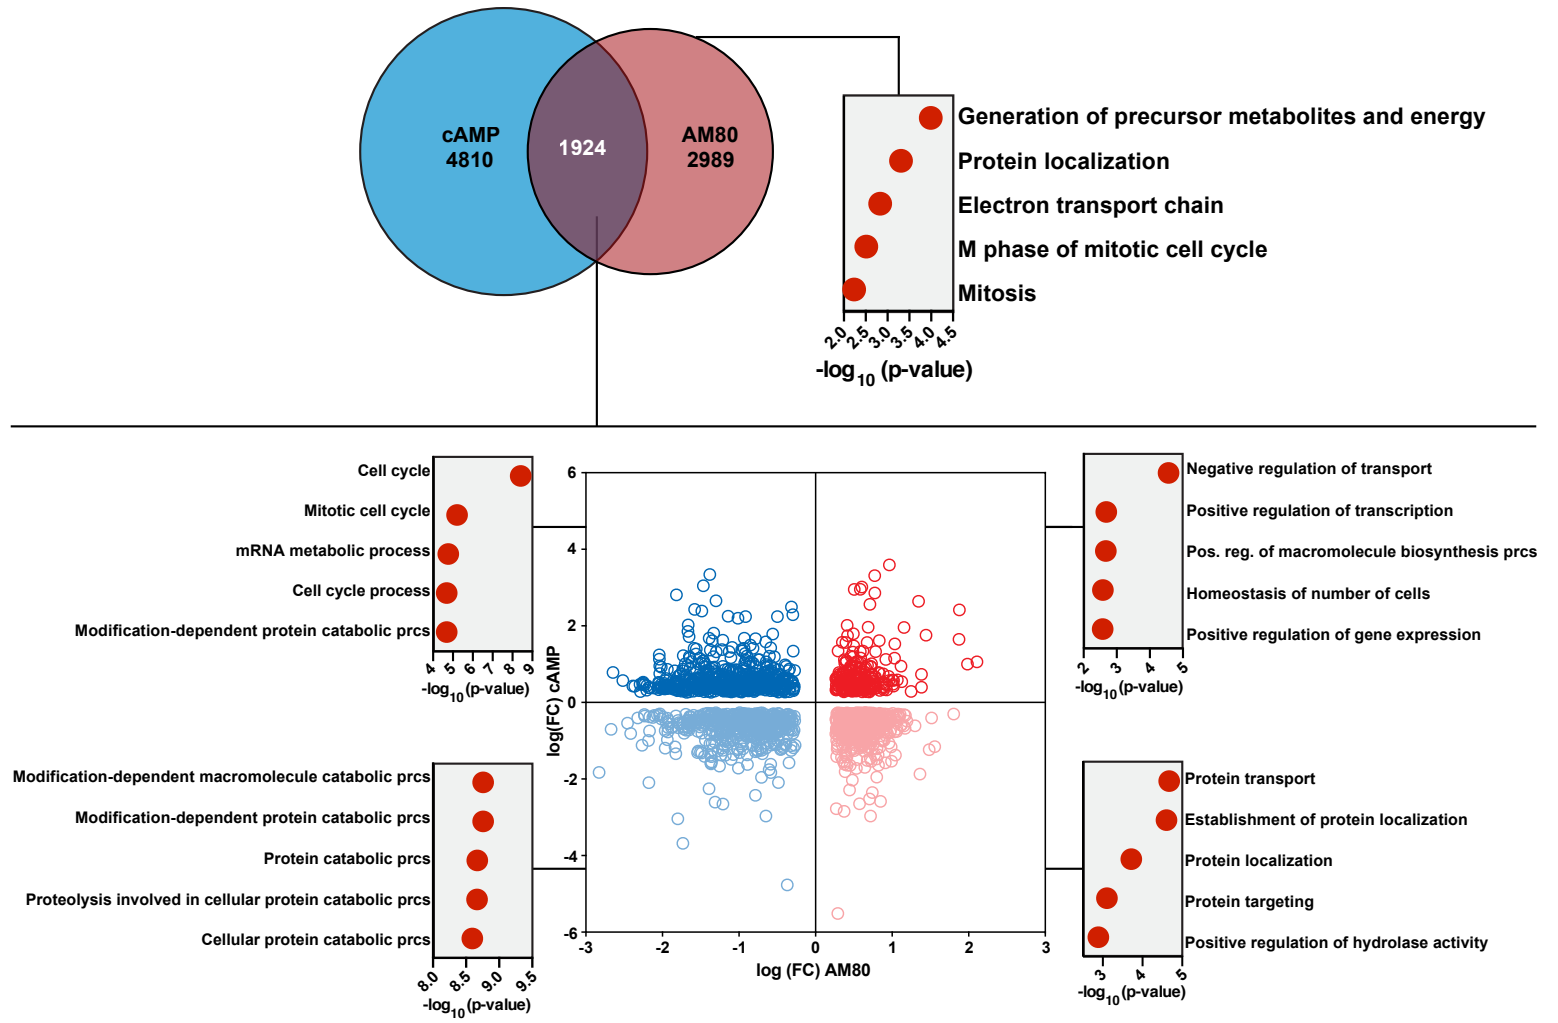

## Supplementary Data – Captions

**Supplementary figure 1.** Mutagenesis of the first ATG codon in PGC-1 $\alpha$ 1 to generate a fusion protein with an EGFP tag.

**Supplementary figure 2. Uncropped pictures of western blots and protein loading control.** Protein lysates from fully differentiated brown adipocytes treated for 8h with indicated compounds (10  $\mu$ M), positive controls, (i=isoproterenol, 4 or 8h) and MG132 or a negative control (D=DMSO) (m= marker for western blot). PVDF membranes were stained with Ponceau S to control for protein loading and transfer efficiency (A-B.).

**Supplementary figure 3. Validation of PGC-1 $\alpha$ 1 protein stabilization by western blot.** Fully differentiated brown adipocytes were treated for 8h with 10 $\mu$ M compounds, 10 $\mu$ M isoproterenol (i) or a negative control d=DMSO and harvested for protein (m=indicates a marker for western blot). Right panel of (A-D) shows Ponceau S stained PVDF membranes.

**Supplementary figure 4. Validation of PGC-1 $\alpha$ 1 protein stabilization by western blot.** Fully differentiated brown adipocytes were treated for 8h with 10 $\mu$ M compounds, 10 $\mu$ M isoproterenol (i) or a negative control d=DMSO and harvested for protein (m=indicates a marker for western blot). Right panel of (A-D) shows Ponceau S stained PVDF membranes.

**Supplementary figure 5. Validation of PGC-1 $\alpha$ 1 protein stabilization by western blot.** Fully differentiated brown adipocytes were treated for 8h with 10 $\mu$ M compounds, 10 $\mu$ M isoproterenol (i) or a negative control d=DMSO and harvested for protein (m=indicates a marker for western blot). Right panel of (A-D) shows Ponceau S stained PVDF membranes.

**Supplementary figure 6. Validation of PGC-1 $\alpha$ 1 protein stabilization by western blot.** Fully differentiated brown adipocytes were treated for 8h with 10 $\mu$ M compounds, 10 $\mu$ M isoproterenol (i) for 1h (i1) or 8h (i8) or a negative control

d=DMSO and harvested for protein (m=indicates a marker for western blot). Right panel of (A-C) shows Ponceau S stained PVDF membranes.

**Supplementary figure 7. Screening cell line 293-EGFPmPGC-1 $\alpha$ 1 treated with compound AM31 or controls (DMSO and MG132).** Images were captured by a 10X objective in the Operetta® High Content Imaging System as described in Online Methods.

**Supplementary figure 8. Screening cell line 293-EGFPmPGC-1 $\alpha$ 1 treated with compound AM73 or controls (DMSO and MG132).** Images were captured by a 10X objective in the Operetta® High Content Imaging System as described in Online Methods.

**Supplementary figure 9. Screening cell line 293-EGFPmPGC-1 $\alpha$ 1 treated with compound AM79 or controls (DMSO and MG132).** Images were captured by a 10X objective in the Operetta® High Content Imaging System as described in Online Methods.

**Supplementary figure 10. Screening cell line 293-EGFPmPGC-1 $\alpha$ 1 treated with compound AM80 or controls (DMSO and MG132).** Control pictures of DMSO and MG132-treated cells are the same as for AM79 and are shown in Supplementary figure 5. Images were captured by a 10X objective in the Operetta® High Content Imaging System as described in Online Methods.

**Supplementary figure 11. Screening cell line 293-EGFPmPGC-1 $\alpha$ 1 treated with compound AM89 or controls (DMSO and MG132).** Images were captured by a 10X objective in the Operetta® High Content Imaging System as described in Online Methods.

**Supplementary figure 12. Comparison of global gene expression changes following cAMP or AM80 treatment of murine brown adipocytes.**

RNA from brown adipocytes treated with 10  $\mu$ M AM80 for 8h was used for global gene expression analysis by microarray. All data was normalized for a negative control (DMSO). Gene lists from AM80 were compared to previously published results from the same cell line treated with cAMP for 4h. Overlap of hits between cAMP 4h versus AM80. Top right panel of shows Gene Ontology (GO) pathways significantly changed by AM80 alone and top left panel shows overlapping genes between AM80 and cAMP treatment. The lower panel shows pathways changed in the same direction; both up (upper right) or both down (lower left); or in opposite direction; up with cAMP 4h and down with AM80 (upper left) or down with cAMP 4h and up with AM80 (lower right).

**Supplementary Table 1. Primer sequences.** Primer sequences listed are for murine transcript except when marked with h=human. Tot Ppargc1a-primers targets all described isoforms of Ppargc1a.

**Supplementary Table 2. Regulatory elements predicted (by DiRE) in the genes regulated by AM73 in brown adipocytes.** RNA from brown adipocytes treated with 10  $\mu$ M AM73 for 8h was used for global gene expression analysis by microarray. All data was normalized for a negative control (DMSO). To predict common regulators of gene expression, microarray data was analyzed by DiRE (distant regulatory elements of co-regulated genes).

**Supplementary Table 3. Regulatory elements predicted (by DiRE) in the genes regulated by AM80 in brown adipocytes.** RNA from brown adipocytes treated with 10  $\mu$ M AM80 for 8h was used for global gene expression analysis by microarray. All data was normalized for a negative control (DMSO). To predict common regulators of gene expression, microarray data was analyzed by DiRE (distant regulatory elements of co-regulated genes).
